# Supplementary material for: Synthesis of piperazine tethered 4-aminoquinoline-pyrimidine hybrids as potent antimalarial agents
Source: Royal Society of Chemistry journal article supplement (doi:10.1039/c4ra02276a), 2014-01-01
Supplement: c4ra02276a1.pdf [file c4ra02276a1.pdf]

# Synthesis of Piperazine Tethered 4-Aminoquinoline-Pyrimidine Hybrids as Potent Antimalarial Agents

## Supporting Information

Anuj Thakur,<sup>a</sup> Shabana I. Khan,<sup>b</sup> Diwan S. Rawat<sup>a,\*</sup>

<sup>a</sup> Department of Chemistry, University of Delhi, Delhi 110 007, India

<sup>b</sup> National Center for Natural Products Research, University of Mississippi, MS 38677, USA

\*Corresponding author: dsrawat@chemistry.du.ac.in

### Crystallographic Data

The crystallization was achieved by the slow evaporation of solution of crude compound in CHCl<sub>3</sub> which afforded highly crystalline compound (**4a**). Diffraction data of compound **4a** were collected on an Oxford CCD diffractometer having Xcalibur, sapphire diffraction measurement device at 293 K, using graphite-monochromated Mo-K $\alpha$  radiation ( $\lambda = 0.71073$  Å) (1). The multi-scan absorption correction was applied using CrysAlisPRO. The crystal structures were solved by the direct methods using SIR-92 and refined by full-matrix least-squares refinement techniques on F<sup>2</sup> using SHELXL97. Hydrogen atoms were placed into the calculated positions and included in the last cycles of the refinement. All calculations were done using WinGX software (2). CCDC 984609 contains the supplementary crystallographic data for compound **4a**. The crystallographic data collection and structure refinement parameters for all complexes are summarized in table 1. These data can be obtained free of charge from The Cambridge Crystallographic Data Centre via [www.ccdc.cam.ac.uk/data\\_request/cif](http://www.ccdc.cam.ac.uk/data_request/cif).

Table 1: X-ray crystallographic data collection and structure refinement parameters for compound **4a**

**Table 1:** X-ray crystallographic data collection and structure refinement parameters for compound **4a**.

| Compound <b>4a</b> |                                                                |
|--------------------|----------------------------------------------------------------|
| Molecular formula  | C <sub>17</sub> H <sub>15</sub> Cl <sub>2</sub> N <sub>5</sub> |
| FW                 | 360.24                                                         |
| T(K)               | 298(2)                                                         |
| Crystal system     | Monoclinic                                                     |
| Space group        | <i>P</i> 2 <sub>1</sub> / <i>c</i>                             |
| A                  | 7.8252(6)                                                      |
| B                  | 11.7133(7)                                                     |

|                                             |                |
|---------------------------------------------|----------------|
| C                                           | 18.1164(13)    |
| $\alpha$                                    | 90             |
| $\beta$                                     | 100.744(7)     |
| $\gamma$                                    | 90             |
| V (Å <sup>3</sup> )                         | 1631.4(2)      |
| Z                                           | 4              |
| d (g cm <sup>-3</sup> )                     | 1.467          |
| F (000)                                     | 744            |
| Goodness of fit (F2)                        | 1.087          |
| R1, wR <sub>2</sub> [I > 2 (I)]             | 0.0398, 0.0953 |
| R1, wR <sub>2</sub> [all data] <sup>a</sup> | 0.0484, 0.0997 |

$$^a R_1 = \frac{\sum ||F_o| - |F_c||}{\sum |F_o|}; wR_2 = \left\{ \frac{\sum [w(F_o/2 - F_c/2)^2]}{\sum wF_o^4} \right\}^{1/2}$$

**Table 2:** Selected bond lengths [Å] for compound **4a**.

| Bond lengths |          |
|--------------|----------|
| Cl(1)-C(1)   | 1.739(2) |
| Cl(2)-C(17)  | 1.750(2) |
| N(1)-C(3)    | 1.367(3) |
| N(1)-C(7)    | 1.310(3) |
| N(2)-C(9)    | 1.410(2) |
| N(2)-C(10)   | 1.455(2) |
| N(2)-C(13)   | 1.474(2) |
| N(3)-C(11)   | 1.458(3) |
| N(3)-C(12)   | 1.455(2) |
| N(3)-C(14)   | 1.351(2) |
| N(4)-C(14)   | 1.352(3) |
| N(4)-C(17)   | 1.314(2) |
| N(5)-C(16)   | 1.352(3) |
| N(5)-C(17)   | 1.308(3) |

**References:**

1. CrysAlisPro, Oxford Diffraction Ltd., version 1.171.33.49b, 2009.
2. L. J. Farrugia, WinGX, version 1.64, An Integrated System of Windows Programs for the Solution, Refinement and analysis of Single-Crystal X-ray Diffraction Data, Department of Chemistry, University of Glasgow, 2003.
